# Supplementary material for: The CD8 + /Foxp3 + ratio, but not the number of OX40 + TILs, is an independent predictor of tumor recurrence in non-muscle-invasive bladder cancer: a retrospective study
Source: PeerJ journal article supplement (doi:10.7717/peerj.20322), 2025-11-13
Supplement: rawdata.xlsx [file rawdata.xlsx]

## Sheet: Sheet1
Case#	Sex(1=male;2=female)	age	multifocality (1=yes, 0=no)	tumor size(cm)	tumor stage	recurrence (1=recurrence, 0=non-recurrence)	interval (month)	number of Foxp3+ TILs	number of OX40+ TILs	number of CD8+ TILs	CD8/FOXP3 ratio	CD8/OX40 ratio	coexpression of CD8 and OX40	coexpression of CD8 and Foxp3
Case 1	2	68	0	1	3	1	25	35	10	2	0.06	0.2	3	3
Case 2	1	72	0	1.5	3	1	22	12	5	2	0.17	0.4	4	3
Case 3	1	59	0	1	2	1	16	8	2	2	0.25	1	4	1
Case 4	1	54	0	6	1	1	13	35	4	10	0.29	2.5	4	3
Case 5	1	85	0	2.5	2	1	10	40	15	12	0.3	0.8	3	3
Case 6	1	79	0	2	3	1	34	6	5	2	0.33	0.4	4	1
Case 7	1	60	0	1.6	2	1	9	40	5	16	0.4	3.2	4	3
Case 8	2	84	1	2	2	1	5	12	7	5	0.42	0.71	4	3
Case 9	1	63	1	2	2	1	2	25	8	12	0.48	1.5	4	3
Case 10	2	85	0	1.5	3	1	16	10	12	5	0.5	0.42	3	3
Case 11	1	70	0	3	3	1	8	60	30	30	0.5	1	1	4
Case 12	1	57	0	2	2	1	9	8	12	5	0.63	0.42	3	1
Case 13	1	53	0	10	2	1	3	12	1	8	0.67	8	4	3
Case 14	1	66	0	4	2	1	1	45	9	30	0.67	3.33	2	4
Case 15	1	72	0	3	4	1	3	22	50	15	0.68	0.3	3	3
Case 16	1	67	1	2	2	1	13	10	3	8	0.8	2.67	4	3
Case 17	1	61	0	2	3	0	1	30	10	25	0.83	2.5	1	4
Case 18	1	82	0	5	4	1	9	18	1	15	0.83	15	4	3
Case 19	1	68	0	2	3	1	17	20	20	20	1	1	3	3
Case 20	1	76	0	3	2	1	19	10	6	10	1	1.67	4	3
Case 21	1	58	0	3.5	2	1	9	50	8	50	1	6.25	2	4
Case 22	1	54	1	5	4	1	3	20	25	20	1	0.8	3	3
Case 23	1	79	1	2	3	1	10	10	1	10	1	10	4	3
Case 24	1	90	0	3	4	1	6	15	7	16	1.07	2.29	4	3
Case 25	1	64	1	4	2	1	7	9	18	10	1.11	0.56	3	1
Case 26	1	79	0	4	3	1	25	25	20	30	1.2	1.5	1	4
Case 27	1	76	0	4	3	1	6	16	10	20	1.25	2	3	3
Case 28	1	81	1	3.5	3	1	3	30	15	40	1.33	2.67	1	4
Case 29	1	56	1	2	2	1	26	20	15	28	1.4	1.87	1	4
Case 30	1	62	0	3	3	1	2	7	2	10	1.43	5	4	1
Case 31	1	70	0	4	2	0	6	15	25	22	1.47	0.88	3	3
Case 32	1	85	0	1.5	2	0	34	10	12	15	1.5	1.25	3	3
Case 33	1	69	0	2.5	3	0	29	20	25	30	1.5	1.2	1	4
Case 34	1	70	1	1	2	1	28	20	15	30	1.5	2	1	4
Case 35	1	81	1	2.5	2	1	19	20	3	30	1.5	10	2	4
Case 36	1	64	1	2.5	2	1	17	13	10	20	1.54	2	3	3
Case 37	2	63	0	1.5	2	1	3	5	4	8	1.6	2	4	1
Case 38	1	71	0	1	2	0	24	15	25	25	1.67	1	1	4
Case 39	1	63	0	4	3	0	40	30	40	50	1.67	1.25	1	4
Case 40	1	79	0	1	2	1	18	6	5	10	1.67	2	4	1
Case 41	1	64	1	5	3	1	5	3	3	5	1.67	1.67	4	1
Case 42	1	73	0	1.5	2	0	3	20	30	35	1.75	1.17	1	4
Case 43	2	77	0	1.5	2	1	26	10	2	18	1.8	9	4	3
Case 44	1	57	1	2	2	1	5	8	8	15	1.88	1.88	4	1
Case 45	1	73	0	2	2	0	28	10	15	20	2	1.33	3	3
Case 46	2	87	0	1	2	1	46	3	1	6	2	6	4	1
Case 47	1	75	0	1	3	1	16	10	10	20	2	2	3	3
Case 48	1	82	0	3	4	1	7	10	10	20	2	2	3	3
Case 49	1	70	0	1	3	1	7	20	3	40	2	13.33	2	4
Case 50	1	58	1	6	2	1	7	10	8	20	2	2.5	4	3
Case 51	1	74	1	1.5	2	1	45	8	3	18	2.25	6	4	1
Case 52	1	91	1	2	3	1	8	20	3	45	2.25	15	2	4
Case 53	1	58	0	3	2	0	31	8	15	20	2.5	1.33	3	1
Case 54	1	54	0	2	3	0	22	20	25	50	2.5	2	1	4
Case 55	1	61	1	3.5	2	0	3	10	20	25	2.5	1.25	1	4
Case 56	2	82	0	5	3	1	6	12	15	30	2.5	2	1	4
Case 57	1	66	1	1.5	2	1	8	6	4	15	2.5	3.75	4	1
Case 58	1	62	1	2.5	4	0	22	10	25	26	2.6	1.04	1	4
Case 59	1	52	1	1	2	1	34	3	2	8	2.67	4	4	1
Case 60	1	47	1	2	2	1	3	9	1	25	2.78	25	2	2
Case 61	1	75	1	2	2	0	12	25	20	70	2.8	3.5	1	4
Case 62	2	58	0	1.5	2	1	5	10	8	30	3	3.75	2	4
Case 63	1	79	0	1.5	2	1	21	8	4	25	3.13	6.25	2	2
Case 64	1	68	0	3	2	0	49	12	6	40	3.33	6.67	2	4
Case 65	1	85	0	4	3	0	21	20	40	70	3.5	1.75	1	4
Case 66	1	77	0	0.9	3	0	12	20	25	70	3.5	2.8	1	4
Case 67	1	57	0	1.6	2	1	39	6	3	22	3.67	7.33	4	1
Case 68	1	85	0	0.5	3	0	4	4	6	15	3.75	2.5	4	1
Case 69	1	59	1	1	2	0	13	8	15	30	3.75	2	1	2
Case 70	1	72	0	2	2	0	26	5	3	20	4	6.67	4	1
Case 71	1	83	0	1.5	2	0	39	20	15	80	4	5.33	1	4
Case 72	1	56	1	3	2	0	16	10	25	40	4	1.6	1	4
Case 73	1	63	1	2	3	1	2	5	4	20	4	5	4	1
Case 74	1	61	0	2	3	0	26	6	20	25	4.17	1.25	1	2
Case 75	1	82	1	2	2	1	12	8	16	35	4.38	2.19	1	2
Case 76	1	68	0	3.5	3	0	3	15	3	70	4.67	23.33	2	4
Case 77	1	64	0	1.5	3	0	43	4	5	20	5	4	4	1
Case 78	1	65	0	4	3	0	48	10	40	50	5	1.25	1	4
Case 79	1	68	1	2.5	2	0	26	5	15	25	5	1.67	1	2
Case 80	1	48	1	3	2	0	35	6	10	30	5	3	1	2
Case 81	1	50	1	1.5	3	0	45	10	15	50	5	3.33	1	4
Case 82	1	63	0	2.5	1	1	6	5	1	25	5	25	2	2
Case 83	1	68	0	1	2	0	26	5	6	30	6	5	2	2
Case 84	2	70	1	2	2	0	18	8	12	50	6.25	4.17	1	2
Case 85	2	66	0	2.5	3	0	38	10	15	70	7	4.67	1	4
Case 86	2	74	0	2	3	0	3	2	4	15	7.5	3.75	4	1
Case 87	1	63	0	1	2	0	36	3	15	24	8	1.6	3	1
Case 88	2	81	0	1	3	0	34	5	15	40	8	2.67	1	2
Case 89	1	61	0	1.5	2	0	29	5	3	40	8	13.33	2	2
Case 90	1	60	0	1	2	0	48	3	3	25	8.33	8.33	2	2
Case 91	2	64	0	0.8	2	0	6	2	5	20	10	4	4	1
Case 92	1	66	0	1.5	2	0	12	6	10	60	10	6	1	2
Case 93	1	55	1	2	2	0	29	3	12	30	10	2.5	1	2
Case 94	1	78	0	2	2	1	20	1	5	10	10	2	4	1
Case 95	2	61	0	2	2	0	44	1	3	12	12	4	4	1
Case 96	2	67	0	2.5	2	0	40	3	6	36	12	6	2	2
Case 97	1	66	1	2	3	0	20	1	1	12	12	12	4	1
Case 98	2	64	0	1	2	0	33	4	8	50	12.5	6.25	2	2
Case 99	1	70	0	0.5	2	0	32	2	4	25	12.5	6.25	2	2
Case 100	1	74	0	2	2	0	31	4	4	50	12.5	12.5	2	2
Case 101	1	59	0	2	2	0	51	4	30	60	15	2	1	2
Case 102	1	63	0	7	2	0	40	2	12	30	15	2.5	1	2
Case 103	1	73	1	2.5	3	0	36	2	10	30	15	3	1	2
Case 104	2	80	0	4.5	4	0	6	2	30	35	17.5	1.17	1	2
Case 105	1	63	0	0.5	2	0	21	2	3	35	17.5	11.67	2	2
Case 106	1	61	1	3.7	3	0	34	4	15	70	17.5	4.67	1	2
Case 107	2	84	0	3	3	0	19	2	15	50	25	3.33	1	2
Case 108	1	75	0	3.5	2	0	20	2	6	60	30	10	2	2
Case 109	1	88	1	2.5	4	0	8	1	5	30	30	6	2	2
Case 110	2	59	1	2	1	0	26	1	5	35	35	7	2	2
